# Supplementary material
Source: PubMed Central journal article supplement (PMC553306)

A

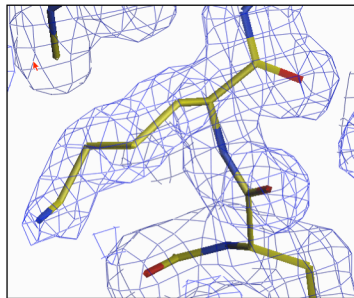

B

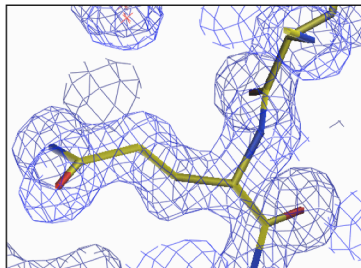

C

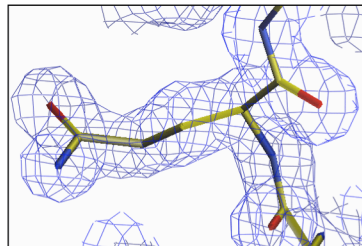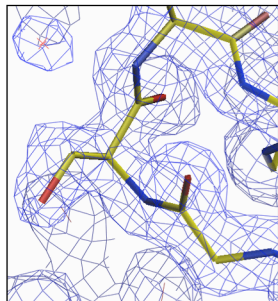

D

E

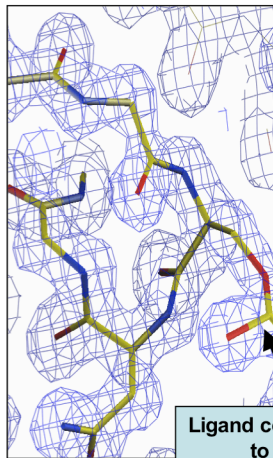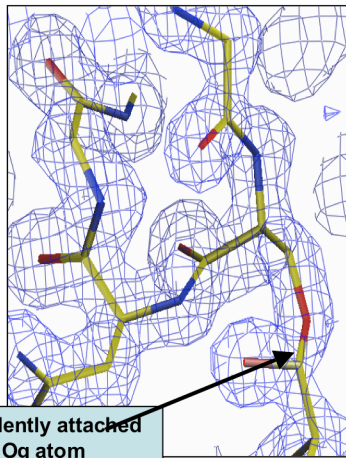

F

Ligand covalently attached  
to the Og atom

Supplement: pnas_102_10_3599__1.pdf [file pnas_102_10_3599__1.pdf]

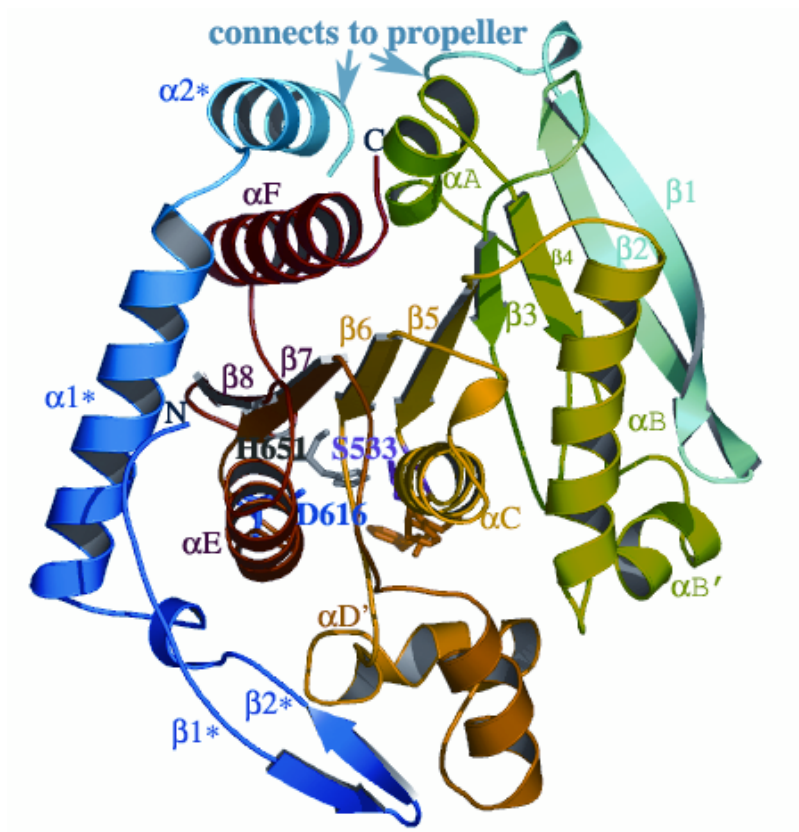

Supplement: pnas_102_10_3599__2.pdf [file pnas_102_10_3599__2.pdf]

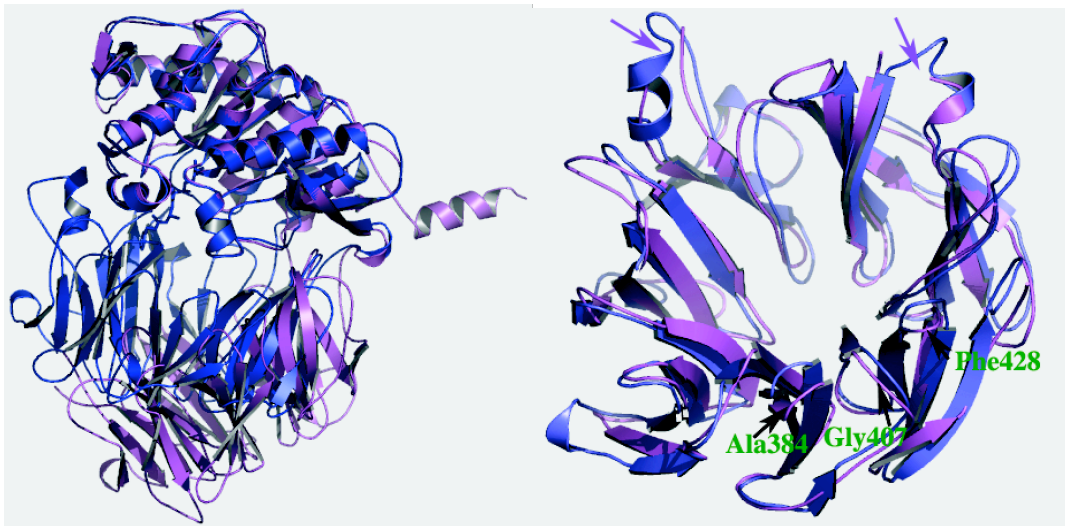

Supplement: pnas_102_10_3599__3.pdf [file pnas_102_10_3599__3.pdf]
